# Supplementary material for: A Novel Phosphorylation Site-Kinase Network-Based Method for the Accurate Prediction of Kinase-Substrate Relationships
Source: Hindawi journal article supplement (doi:10.1155/2017/1826496), 2017-01-01
Supplement: f1 [file 1826496.f1.pdf]

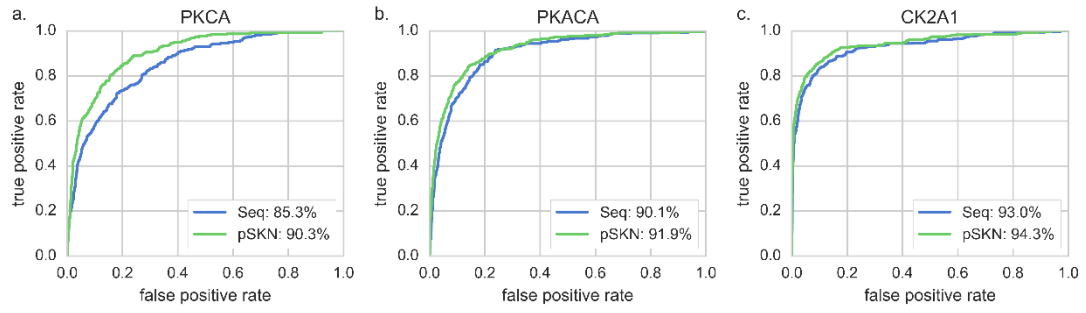

**Figure S1. Comparison of ROC curves using different information.** The blue lines represent our method constructed with local sequence only, and the green lines represent our method built with local sequence and pSKN profiles together.

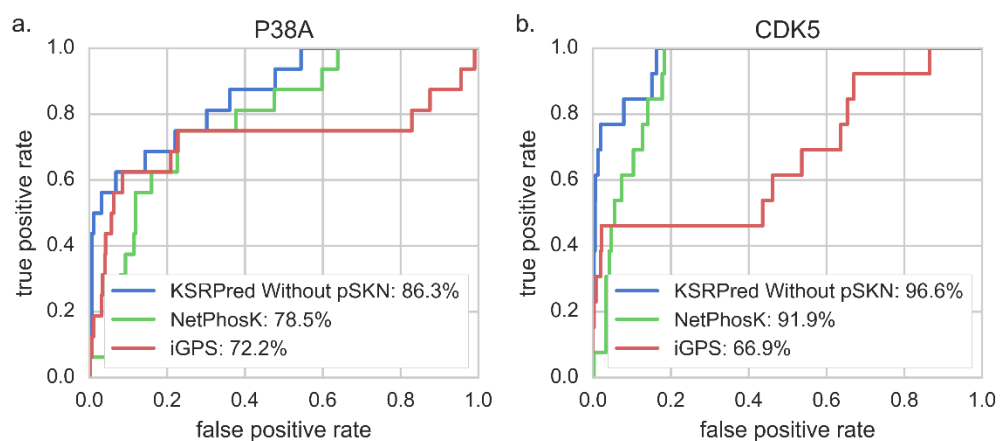

**Figure S2. Compare the ROC curves of three methods: KSRPred without pSKN profile, NetPhosK and iGPS.** The blue lines represent the ROC curve of KSRPred without pSKN profile, and the red and green lines represent the ROC curves of iGPS and NetPhosK, respectively.

**Table S1. The number of known phosphorylation sites of 103 kinases.**

| <b>Kinases</b> | <b>Number</b> | <b>Kinases</b> | <b>Number</b> | <b>Kinases</b> | <b>Number</b> | <b>Kinases</b> | <b>Number</b> |
|----------------|---------------|----------------|---------------|----------------|---------------|----------------|---------------|
| ABL            | 112           | CK1E           | 27            | JAK2           | 29            | PKCA           | 318           |
| AKT1           | 182           | CK2A1          | 361           | JAK3           | 16            | PKCB           | 33            |
| AKT2           | 19            | CK2A2          | 17            | JNK1           | 86            | PKCB ISO2      | 30            |
| AMPKA1         | 68            | DAPK3          | 15            | JNK2           | 31            | PKCD           | 80            |
| AMPKA2         | 19            | DNAPK          | 88            | LCK            | 78            | PKCE           | 47            |
| ASK1           | 16            | DYRK1A         | 18            | LKB1           | 31            | PKCG           | 20            |
| ATM            | 193           | EGFR           | 59            | LRRK2          | 46            | PKCI           | 16            |
| ATR            | 67            | ERK1           | 214           | LYN            | 76            | PKCT           | 26            |
| AURA           | 75            | ERK2           | 269           | MAPKAPK2       | 53            | PKCZ           | 46            |
| AURB           | 114           | ERK5           | 21            | MELK           | 22            | PKG1           | 33            |
| BTK            | 19            | ETK            | 16            | MET            | 29            | PKR            | 17            |
| BUB1           | 23            | FAK            | 19            | MSK1           | 15            | PLK1           | 179           |
| CAMK2A         | 69            | FGFR1          | 31            | MST1           | 21            | PLK3           | 28            |
| CDC7           | 18            | FYN            | 85            | MST2           | 19            | PRKD1          | 44            |
| CDK1           | 401           | GRK2           | 50            | MTOR           | 67            | RET            | 24            |
| CDK2           | 449           | GSK3A          | 20            | NEK2           | 21            | ROCK1          | 47            |
| CDK4           | 44            | GSK3B          | 149           | P38A           | 146           | RSK2           | 41            |
| CDK5           | 73            | HCK            | 20            | P38B           | 20            | SGK1           | 23            |
| CDK6           | 24            | HER2           | 15            | P70S6K         | 33            | SRC            | 324           |
| CDK7           | 39            | HIPK2          | 33            | P90RSK         | 48            | SRPK1          | 16            |
| CDK9           | 34            | IGF1R          | 19            | PAK1           | 54            | SYK            | 49            |
| CHAK1          | 41            | IKKA           | 26            | PAK2           | 17            | TBK1           | 26            |
| CHK1           | 149           | IKKB           | 41            | PDGFRB         | 22            | TTK            | 41            |
| CHK2           | 48            | IKKE           | 21            | PDK1           | 28            | ULK1           | 18            |
| CK1A           | 85            | INSR           | 39            | PIM1           | 29            | ZAP70          | 20            |
| CK1D           | 54            | IRAK4          | 18            | PKACA          | 342           |                |               |

**Table S2. Comparison of prediction performance using different information at the high strategic level ( $Sp = 95.0\%$ ).**

| <b>Kinases</b> | <b>Methods</b> | <b><i>Sn</i></b> | <b><i>MCC</i></b> | <b><i>F1</i></b> | <b><i>Pre</i></b> |
|----------------|----------------|------------------|-------------------|------------------|-------------------|
| CDK2           | <i>Seq</i>     | 38.3%            | 33.5%             | 38.6%            | 38.9%             |
|                | <i>pSKN</i>    | 57.5%            | 48.7%             | 52.8%            | 48.9%             |
|                | <i>Full</i>    | 71.9%            | 59.0%             | 62.0%            | 54.5%             |
| CK2A1          | <i>Seq</i>     | 74.8%            | 57.8%             | 59.7%            | 49.6%             |
|                | <i>pSKN</i>    | 79.8%            | 61.1%             | 62.4%            | 51.2%             |
|                | <i>Full</i>    | 83.9%            | 63.7%             | 64.6%            | 52.5%             |
| FYN            | <i>Seq</i>     | 44.7%            | 20.7%             | 18.5%            | 11.7%             |
|                | <i>pSKN</i>    | 58.8%            | 27.6%             | 23.6%            | 14.8%             |
|                | <i>Full</i>    | 69.4%            | 32.6%             | 27.3%            | 17.0%             |
| GSK3B          | <i>Seq</i>     | 34.9%            | 20.2%             | 21.4%            | 15.4%             |
|                | <i>pSKN</i>    | 52.3%            | 30.9%             | 30.5%            | 21.5%             |
|                | <i>Full</i>    | 58.4%            | 34.5%             | 33.4%            | 23.4%             |
| P38A           | <i>Seq</i>     | 27.4%            | 15.2%             | 17.0%            | 12.3%             |
|                | <i>pSKN</i>    | 39.7%            | 23.1%             | 23.7%            | 16.9%             |
|                | <i>Full</i>    | 47.9%            | 28.1%             | 27.9%            | 19.7%             |
| PKACA          | <i>Seq</i>     | 53.2%            | 42.2%             | 45.6%            | 39.8%             |
|                | <i>pSKN</i>    | 62.0%            | 48.4%             | 51.1%            | 43.5%             |
|                | <i>Full</i>    | 70.2%            | 54.0%             | 56.0%            | 46.6%             |
| PKCA           | <i>Seq</i>     | 45.6%            | 35.6%             | 39.2%            | 34.4%             |
|                | <i>pSKN</i>    | 58.8%            | 45.2%             | 47.9%            | 40.4%             |
|                | <i>Full</i>    | 63.8%            | 48.7%             | 50.9%            | 42.4%             |
| PLK1           | <i>Seq</i>     | 37.4%            | 23.6%             | 25.3%            | 19.1%             |
|                | <i>pSKN</i>    | 54.2%            | 34.4%             | 34.7%            | 25.5%             |
|                | <i>Full</i>    | 66.5%            | 41.9%             | 41.0%            | 29.6%             |
| SRC            | <i>Seq</i>     | 46.9%            | 36.8%             | 40.4%            | 35.5%             |
|                | <i>pSKN</i>    | 72.2%            | 54.5%             | 56.1%            | 45.9%             |
|                | <i>Full</i>    | 78.7%            | 58.7%             | 59.6%            | 48.0%             |

**Table S3. The predictive performance of all kinases**

| <b>Kinases</b> | <b><i>Full</i></b> | <b>Kinases</b> | <b><i>Full</i></b> | <b>Kinases</b> | <b><i>Full</i></b> | <b>Kinases</b> | <b><i>Full</i></b> |
|----------------|--------------------|----------------|--------------------|----------------|--------------------|----------------|--------------------|
| ABL            | 95.7%              | CK1E           | 96.7%              | JAK2           | 94.4%              | PKCA           | 90.9%              |
| AKT1           | 95.1%              | CK2A1          | 94.2%              | JAK3           | 99.4%              | PKCB           | 85.2%              |
| AKT2           | 88.0%              | CK2A2          | 98.0%              | JNK1           | 93.9%              | PKCB ISO2      | 91.7%              |
| AMPKA1         | 91.4%              | DAPK3          | 89.9%              | JNK2           | 90.3%              | PKCD           | 84.2%              |
| AMPKA2         | 87.9%              | DNAPK          | 93.7%              | LCK            | 96.3%              | PKCE           | 84.7%              |
| ASK1           | 98.1%              | DYRK1A         | 90.5%              | LKB1           | 93.6%              | PKCG           | 85.5%              |
| ATM            | 95.6%              | EGFR           | 95.5%              | LRRK2          | 96.9%              | PKCI           | 86.2%              |
| ATR            | 96.1%              | ERK1           | 95.7%              | LYN            | 95.4%              | PKCT           | 79.6%              |
| AURA           | 88.7%              | ERK2           | 95.1%              | MAPKAPK2       | 85.7%              | PKCZ           | 87.4%              |
| AURB           | 94.1%              | ERK5           | 90.6%              | MELK           | 96.4%              | PKG1           | 94.9%              |
| BTK            | 95.8%              | ETK            | 98.9%              | MET            | 99.5%              | PKR            | 92.9%              |
| BUB1           | 99.6%              | FAK            | 91.1%              | MSK1           | 87.3%              | PLK1           | 89.7%              |
| CAMK2A         | 85.3%              | FGFR1          | 96.1%              | MST1           | 96.7%              | PLK3           | 85.4%              |
| CDC7           | 99.5%              | FYN            | 95.1%              | MST2           | 99.1%              | PRKD1          | 90.2%              |
| CDK1           | 93.9%              | GRK2           | 89.5%              | MTOR           | 92.0%              | RET            | 92.3%              |
| CDK2           | 93.1%              | GSK3A          | 93.9%              | NEK2           | 95.2%              | ROCK1          | 95.4%              |
| CDK4           | 98.5%              | GSK3B          | 89.0%              | P38A           | 90.1%              | RSK2           | 90.9%              |
| CDK5           | 89.4%              | HCK            | 97.8%              | P38B           | 97.6%              | SGK1           | 90.0%              |
| CDK6           | 97.0%              | HER2           | 90.6%              | P70S6K         | 92.3%              | SRC            | 97.1%              |
| CDK7           | 91.0%              | HIPK2          | 90.8%              | P90RSK         | 90.3%              | SRPK1          | 99.7%              |
| CDK9           | 91.1%              | IGF1R          | 98.8%              | PAK1           | 79.5%              | SYK            | 96.3%              |
| CHAK1          | 99.5%              | IKKA           | 93.3%              | PAK2           | 92.1%              | TBK1           | 92.0%              |
| CHK1           | 92.2%              | IKKB           | 92.9%              | PDGFRB         | 96.1%              | TTK            | 90.5%              |
| CHK2           | 83.5%              | IKKE           | 94.1%              | PDK1           | 97.1%              | ULK1           | 98.3%              |
| CK1A           | 91.5%              | INSR           | 97.0%              | PIM1           | 91.5%              | ZAP70          | 98.9%              |
| CK1D           | 92.7%              | IRAK4          | 99.9%              | PKACA          | 92.4%              |                |                    |

**Table S4. Comparison of prediction performance of different methods at the high and medium strategy levels.**

| Kinases | Measures                                       | Specificity (Sp)=95.0% |             |                  |                 |                | Specificity (Sp)=90.0% |             |                  |                 |                |
|---------|------------------------------------------------|------------------------|-------------|------------------|-----------------|----------------|------------------------|-------------|------------------|-----------------|----------------|
|         |                                                | <i>iGPS</i>            | <i>PKIS</i> | <i>NetworKIN</i> | <i>NetPhosK</i> | <i>KSRPred</i> | <i>iGPS</i>            | <i>PKIS</i> | <i>NetworKIN</i> | <i>NetPhosK</i> | <i>KSRPred</i> |
| SRC     | <i>Sensitivity (Sn)</i>                        | 51.8%                  | 44.6%       | 7.1%             | 51.8%           | 94.6%          | 53.6%                  | 69.6%       | 8.9%             | 100.0%          | 100.0%         |
|         | <i>F1-Measure (F1)</i>                         | 43.9%                  | 39.1%       | 7.5%             | 43.9%           | 67.9%          | 33.3%                  | 41.3%       | 6.5%             | 54.4%           | 54.4%          |
|         | <i>Precision (Pre)</i>                         | 38.2%                  | 34.7%       | 7.8%             | 38.2%           | 53.0%          | 24.2%                  | 29.3%       | 5.1%             | 37.3%           | 37.3%          |
|         | <i>Matthew's Correlation Coefficient (MCC)</i> | 40.6%                  | 35.3%       | 2.3%             | 40.6%           | 68.7%          | 30.4%                  | 40.4%       | -0.8%            | 58.0%           | 58.0%          |
| DNAPK   | <i>Sensitivity (Sn)</i>                        | 29.4%                  | 23.5%       | 35.3%            | 35.3%           | 82.4%          | 29.4%                  | 41.2%       | 41.2%            | 52.9%           | 94.1%          |
|         | <i>F1-Measure (F1)</i>                         | 14.1%                  | 11.4%       | 16.7%            | 16.7%           | 35.0%          | 8.3%                   | 11.5%       | 11.5%            | 14.5%           | 24.4%          |
|         | <i>Precision (Pre)</i>                         | 9.3%                   | 7.5%        | 10.9%            | 10.9%           | 22.2%          | 4.9%                   | 6.7%        | 6.7%             | 8.4%            | 14.0%          |
|         | <i>Matthew's Correlation Coefficient (MCC)</i> | 14.0%                  | 10.7%       | 17.2%            | 17.2%           | 41.2%          | 8.3%                   | 13.2%       | 13.2%            | 18.0%           | 34.2%          |
| P38A    | <i>Sensitivity (Sn)</i>                        | 43.8%                  | 25.0%       | 25.0%            | 6.3%            | 68.8%          | 62.5%                  | 56.3%       | 31.3%            | 37.5%           | 68.8%          |
|         | <i>F1-Measure (F1)</i>                         | 19.4%                  | 11.6%       | 11.6%            | 3.0%            | 28.9%          | 16.1%                  | 14.6%       | 8.4%             | 10.0%           | 17.6%          |
|         | <i>Precision (Pre)</i>                         | 12.5%                  | 7.5%        | 7.5%             | 2.0%            | 18.3%          | 9.3%                   | 8.4%        | 4.9%             | 5.8%            | 10.1%          |
|         | <i>Matthew's Correlation Coefficient (MCC)</i> | 21.2%                  | 11.2%       | 11.2%            | 0.7%            | 33.7%          | 21.2%                  | 18.8%       | 8.8%             | 11.3%           | 23.7%          |
| CDK5    | <i>Sensitivity (Sn)</i>                        | 46.2%                  | 15.4%       | 15.4%            | 46.2%           | 84.6%          | 46.2%                  | 23.1%       | 53.8%            | 61.5%           | 92.3%          |
|         | <i>F1-Measure (F1)</i>                         | 17.6%                  | 6.3%        | 6.3%             | 17.6%           | 30.1%          | 10.2%                  | 5.2%        | 11.8%            | 13.3%           | 19.4%          |
|         | <i>Precision (Pre)</i>                         | 10.9%                  | 3.9%        | 3.9%             | 10.9%           | 18.3%          | 5.7%                   | 2.9%        | 6.6%             | 7.5%            | 10.8%          |
|         | <i>Matthew's Correlation Coefficient (MCC)</i> | 20.5%                  | 5.4%        | 5.4%             | 20.5%           | 38.0%          | 13.3%                  | 4.9%        | 16.1%            | 18.9%           | 29.7%          |
